# Supplementary material
Source: ML conference proceedings conference paper supplement (https://proceedings.neurips.cc/paper_files/paper/2023/hash/a5f596699d8d4637532f955c7f2860f4-Abstract.html)
Supplement: Supplementary file 1 [file a5f596699d8d4637532f955c7f2860f4-Supplemental-Datasets_and_Benchmarks.pdf]

## A What Is Inside the Datasets?

Every dataset is repacked into HDF5 files similar to Fu et al. (2020). The data keys are described in Table 3; along to the typical  $(s_t, a_t, r_t, d_t)$  tuples, the metadata is also provided as the datasets’ attributes with a comprehensive information about specific trajectories similar to Hambro et al. (2022b). The re-packing script is provided at [https://github.com/tinkoff-ai/katakomba/scripts/generate\\_small\\_dataset.py](https://github.com/tinkoff-ai/katakomba/scripts/generate_small_dataset.py).

Table 3: The re-packed datasets constitute of transformed data from Hambro et al. (2022b). Dissimilar the the large scale dataset, the repacked data is now in the format familiar to the ORL practitioners. We also save the metadata for each trajectory, for a comprehensive description, please, see Appendix F in Hambro et al. (2022b).

| Name       | Type     | Shape        | Description                                                                                                                                                                                                                                                                    |
|------------|----------|--------------|--------------------------------------------------------------------------------------------------------------------------------------------------------------------------------------------------------------------------------------------------------------------------------|
| tty_chars  | np.uint8 | [B, T, H, W] | $s_t$ : The on-screen characters (default screen size 80 x 24).                                                                                                                                                                                                                |
| tty_colors | np.int8  | [B, T, H, W] | $s_t$ : The on-screen colors for each character.                                                                                                                                                                                                                               |
| tty_cursor | np.int16 | [B, T, 2]    | $s_t$ : The coordinates of the on-screen cursor.                                                                                                                                                                                                                               |
| actions    | np.uint8 | [B, T]       | $a_t$ : The NLE actions the player made in response to the $s_t$ .                                                                                                                                                                                                             |
| rewards    | np.int32 | [B, T]       | $r_t$ : The difference between in-game scores at states $s_t$ and $s_{t-1}$ . Note that this was used in all implementations of the algorithms provided in Hambro et al. (2022b). We also found that without this reward-shaping, all offline RL algorithms failed completely. |
| done       | np.uint8 | [B, T]       | $d_t$ : An indicator whether the current state is the last one in the trajectory.                                                                                                                                                                                              |

## B License

Our codebase and repacked datasets are released under the NETHACK GENERAL PUBLIC LICENSE. The original NetHack Learning environment (Küttler et al., 2020) and large-scale datasets (Hambro et al., 2022b) are also released under NETHACK GENERAL PUBLIC LICENSE.

## C General Ethic Conduct and Potential Negative Societal Impact

To the best of our knowledge, our work does not present any direct potential negative societal impact. As of the general ethic conduct, we believe that the most relevant issue to be discussed is the "Consent to use or share the data". Our work is largely built upon both the NetHack Learning Environment (Küttler et al., 2020) and the corresponding large-scale dataset (Hambro et al., 2022b), and as already described in the Appendix B both are distributed under the NETHACK GENERAL PUBLIC LICENSE that explicitly allows for re-usage and re-distribution.

## D Resources and Statistics

We used 64 separated computational nodes with 1xA100, 14CPU, 128GB RAM, and the NVMe as long-term storage for all our experiments. All the values reported in the paper were also obtained under this configuration. One can also find more detailed information inside the Weights&Biases logs in the code repository.

Table 4: Scores used for Normalization. You can also find them at <https://github.com/tinkoff-ai/katakomba/katakomba/utils/scores.py>. For other statistics, please, see Table 2 in the main text.

| Tasks                               | Minimum Score | Maximum Score | Mean Score |
|-------------------------------------|---------------|---------------|------------|
| <b>Base (Role-Centric)</b>          | -             | -             | -          |
| <u>arc</u> -hum-neu                 | 0.0           | 138103.0      | 6636.44    |
| <u>bar</u> -hum-neu                 | 0.0           | 292342.0      | 17836.68   |
| <u>cav</u> -hum-neu                 | 0.0           | 258978.0      | 12113.87   |
| <u>hea</u> -hum-neu                 | 0.0           | 64337.0       | 4068.27    |
| <u>kni</u> -hum-law                 | 0.0           | 419154.0      | 14137.06   |
| <u>mon</u> -hum-neu                 | 0.0           | 171224.0      | 17456.05   |
| <u>pri</u> -hum-neu                 | 0.0           | 114269.0      | 7732.69    |
| <u>ran</u> -hum-neu                 | 0.0           | 54874.0       | 8067.99    |
| <u>rog</u> -hum-cha                 | 0.0           | 68628.0       | 4818.20    |
| <u>sam</u> -hum-law                 | 0.0           | 155163.0      | 11009.36   |
| <u>tou</u> -hum-neu                 | 0.0           | 59484.0       | 4211.47    |
| <u>val</u> -hum-neu                 | 16.0          | 313858.0      | 18624.77   |
| <u>wiz</u> -hum-neu                 | 0.0           | 71709.0       | 5323.48    |
| <b>Extended (Race-Centric)</b>      | -             | -             | -          |
| <u>pri</u> -elf-cha                 | 0.0           | 83744.0       | 7109.35    |
| <u>ran</u> -elf-cha                 | 0.0           | 66690.0       | 9014.18    |
| <u>wiz</u> -elf-cha                 | 0.0           | 71664.0       | 5005.16    |
| <u>arc</u> -dwa-law                 | 0.0           | 83496.00      | 5445.69    |
| <u>cav</u> -dwa-law                 | 0.0           | 161682.0      | 11893.48   |
| <u>val</u> -dwa-law                 | 0.0           | 1136591.0     | 23473.61   |
| <u>arc</u> -gno-neu                 | 0.0           | 110054.0      | 5316.57    |
| <u>cav</u> -gno-neu                 | 0.0           | 142460.0      | 10083.06   |
| <u>hea</u> -gno-neu                 | 0.0           | 69566.0       | 3783.93    |
| <u>ran</u> -gno-neu                 | 0.0           | 58137.0       | 6965.04    |
| <u>wiz</u> -gno-neu                 | 0.0           | 37376.0       | 4317.51    |
| <u>bar</u> -orc-cha                 | 0.0           | 164296.0      | 17594.38   |
| <u>ran</u> -orc-cha                 | 3.0           | 69244.0       | 7608.48    |
| <u>rog</u> -orc-cha                 | 0.0           | 54892.0       | 4897.69    |
| <u>wiz</u> -orc-cha                 | 0.0           | 40871.0       | 5016.74    |
| <b>Complete (Alignment-Centric)</b> | -             | -             | -          |
| <u>arc</u> -hum-law                 | 2.0           | 84823.0       | 5826.35    |
| <u>cav</u> -hum-law                 | 0.0           | 156966.0      | 12462.82   |
| <u>mon</u> -hum-law                 | 7.0           | 190783.0      | 16091.57   |
| <u>pri</u> -hum-law                 | 0.0           | 99250.0       | 6847.99    |
| <u>val</u> -hum-law                 | 0.0           | 428274.0      | 26103.03   |
| <u>bar</u> -hum-cha                 | 0.0           | 164446.0      | 18228.11   |
| <u>mon</u> -hum-cha                 | 0.0           | 223997.0      | 18353.30   |
| <u>pri</u> -hum-cha                 | 0.0           | 58367.0       | 8262.56    |
| <u>ran</u> -hum-cha                 | 3.0           | 62599.0       | 8378.50    |
| <u>wiz</u> -hum-cha                 | 0.0           | 55185.0       | 5316.82    |

## 498 E Hyperparameters

499 For all algorithms, hyperparameters have been reused from previous work whenever possible. For  
500 BC, CQL, and IQL reference values, see Appendix I.4 in the Hambro et al. (2022b). For AWAC,  
501 hyperparameters from IQL were reused due to the very similar policy updating scheme. For REM,  
502 hyperparameters were taken from the original work (see Agarwal et al. (2020)).

503 As in Hambro et al. (2022b), and in contrast to the original CQL implementation, we multiply the TD  
504 loss by the  $\alpha$  coefficient instead of the CQL loss, as we observed better results with such a scheme.  
505 We performed a search for  $\alpha \in [0.0001, 0.0005, 0.001, 0.05, 0.01, 0.05, 0.1, 0.5, 1.0]$  with best value  
506  $\alpha = 0.0001$ .

Table 5: BC hyperparameters.

| Parameter           | Value                                                |
|---------------------|------------------------------------------------------|
| optimizer           | AdamW (Kingma & Ba, 2014; Loshchilov & Hutter, 2017) |
| training iterations | 500000                                               |
| batch size          | 64                                                   |
| sequence length     | 16                                                   |
| learning rate       | 3e-4                                                 |
| weight decay        | 0.0                                                  |
| state encoder       | Chaotic-Dwarven-GPT-5(Hambro et al., 2022a,b)        |
| LSTM hidden dim     | 2048                                                 |
| LSTM layers         | 2                                                    |
| LSTM dropout        | 0.0                                                  |
| use previous action | True                                                 |

Table 6: CQL hyperparameters. Note that in our implementation, the  $\alpha$  coefficient multiplies the TD loss.

| Parameter           | Value                                                |
|---------------------|------------------------------------------------------|
| optimizer           | AdamW (Kingma & Ba, 2014; Loshchilov & Hutter, 2017) |
| training iterations | 500000                                               |
| batch size          | 64                                                   |
| sequence length     | 16                                                   |
| learning rate       | 3e-4                                                 |
| weight decay        | 0.0                                                  |
| state encoder       | Chaotic-Dwarven-GPT-5(Hambro et al., 2022a,b)        |
| LSTM hidden dim     | 2048                                                 |
| LSTM layers         | 2                                                    |
| LSTM dropout        | 0.0                                                  |
| use previous action | True                                                 |
| tau ( $\tau$ )      | 5e-3                                                 |
| gamma ( $\gamma$ )  | 0.999                                                |
| reward clip range   | [-10.0, 10.0]                                        |
| alpha ( $\alpha$ )  | 1e-4                                                 |

Table 7: IQL hyperparameters.

| Parameter           | Value                                                |
|---------------------|------------------------------------------------------|
| optimizer           | AdamW (Kingma & Ba, 2014; Loshchilov & Hutter, 2017) |
| training iterations | 500000                                               |
| batch size          | 64                                                   |
| sequence length     | 16                                                   |
| learning rate       | 3e-4                                                 |
| weight decay        | 0.0                                                  |
| state encoder       | Chaotic-Dwarven-GPT-5(Hambro et al., 2022a,b)        |
| LSTM hidden dim     | 2048                                                 |
| LSTM layers         | 2                                                    |
| LSTM dropout        | 0.0                                                  |
| use previous action | True                                                 |
| tau ( $\tau$ )      | 5e-3                                                 |
| gamma ( $\gamma$ )  | 0.999                                                |
| reward clip range   | [-10.0, 10.0]                                        |
| expectile           | 0.8                                                  |
| temperature         | 1.0                                                  |
| advantage clip max  | 100                                                  |

Table 8: AWAC hyperparameters.

| Parameter           | Value                                                |
|---------------------|------------------------------------------------------|
| optimizer           | AdamW (Kingma & Ba, 2014; Loshchilov & Hutter, 2017) |
| training iterations | 500000                                               |
| batch size          | 64                                                   |
| sequence length     | 16                                                   |
| learning rate       | 3e-4                                                 |
| weight decay        | 0.0                                                  |
| state encoder       | Chaotic-Dwarven-GPT-5(Hambro et al., 2022a,b)        |
| LSTM hidden dim     | 2048                                                 |
| LSTM layers         | 2                                                    |
| LSTM dropout        | 0.0                                                  |
| use previous action | True                                                 |
| tau ( $\tau$ )      | 5e-3                                                 |
| gamma ( $\gamma$ )  | 0.999                                                |
| reward clip range   | [-10.0, 10.0]                                        |
| temperature         | 1.0                                                  |
| advantage clip max  | 100                                                  |

Table 9: REM hyperparameters.

| Parameter           | Value                                                |
|---------------------|------------------------------------------------------|
| optimizer           | AdamW (Kingma & Ba, 2014; Loshchilov & Hutter, 2017) |
| training iterations | 500000                                               |
| batch size          | 64                                                   |
| sequence length     | 16                                                   |
| learning rate       | 3e-4                                                 |
| weight decay        | 0.0                                                  |
| state encoder       | Chaotic-Dwarven-GPT-5(Hambro et al., 2022a,b)        |
| LSTM hidden dim     | 2048                                                 |
| LSTM layers         | 2                                                    |
| LSTM dropout        | 0.0                                                  |
| use previous action | True                                                 |
| tau ( $\tau$ )      | 5e-3                                                 |
| gamma ( $\gamma$ )  | 0.999                                                |
| reward clip range   | [-10.0, 10.0]                                        |
| ensemble heads      | 200.0                                                |

## 507 F Results per Benchmark Categories

508 In this section, we report the results stratified by the introduced categories. If one is willing to  
 509 inspect specific datasets, we organized all training logs into Weights&Biases public reports, found at  
 510 <https://wandb.ai/tlab/NetHack/reports>.

511 Note that one can find all the evaluation scores (for more than one checkpoint) within the runs and use  
 512 them for any evaluation tools of interest. Also, we provide convenient scripts for constructing RLiab  
 513 (Agarwal et al., 2021) graphs based on the provided runs that can be configured for one’s purposes as  
 514 well (see [https://github.com/tinkoff-ai/katakomba/scripts/rliable\\_report.py](https://github.com/tinkoff-ai/katakomba/scripts/rliable_report.py)).

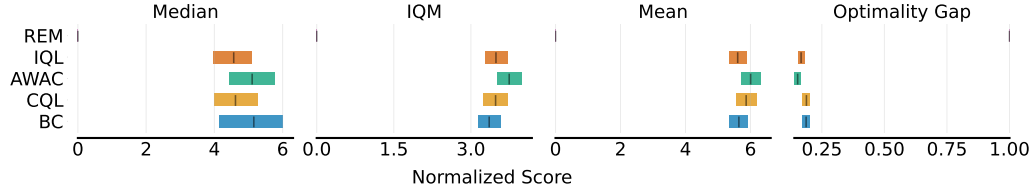

(a) Bootstrapped point estimates.

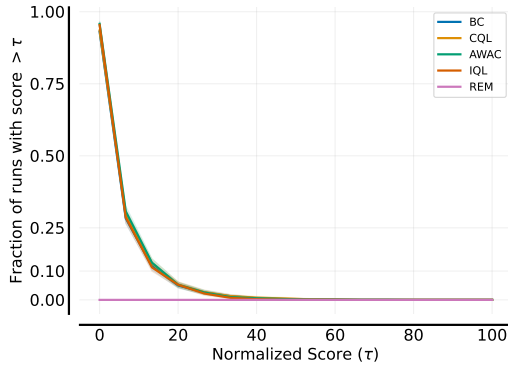

(b) Performance profiles.

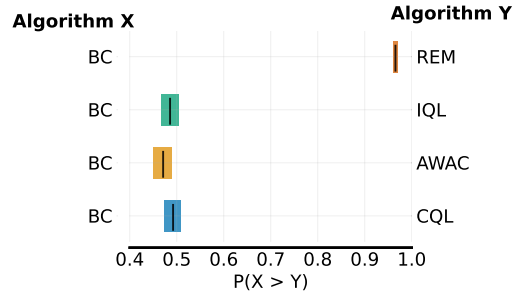

(c) Probability of improvement of BC to other algorithms.

Figure 3: Normalized performance under the Katakomba benchmark for Base datasets. Each algorithm was run for three seeds and evaluated over 50 episodes resulting in 1950 points for constructing these graphs.

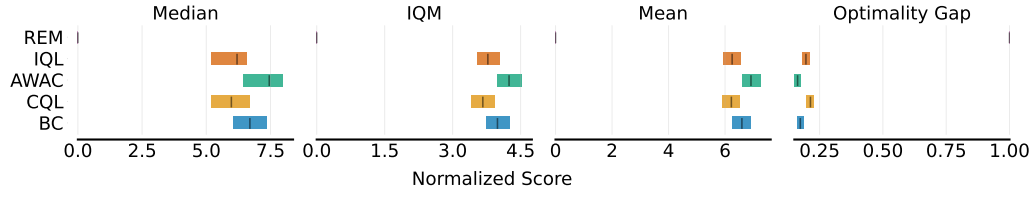

(a) Bootstrapped point estimates.

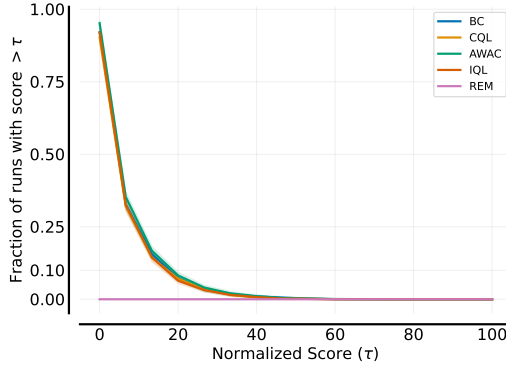

(b) Performance profiles.

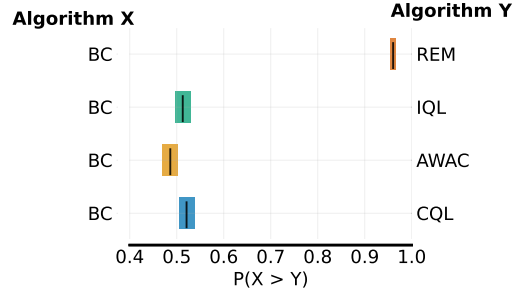

(c) Probability of improvement of BC to other algorithms.

Figure 4: Normalized performance under the Katakomba benchmark for Extended datasets. Each algorithm was run for three seeds and evaluated over 50 episodes resulting in 2250 points for constructing these graphs.

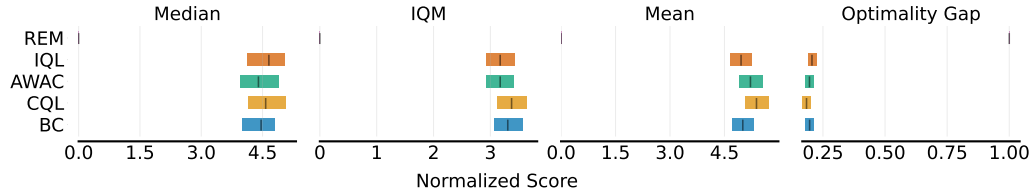

(a) Bootstrapped point estimates.

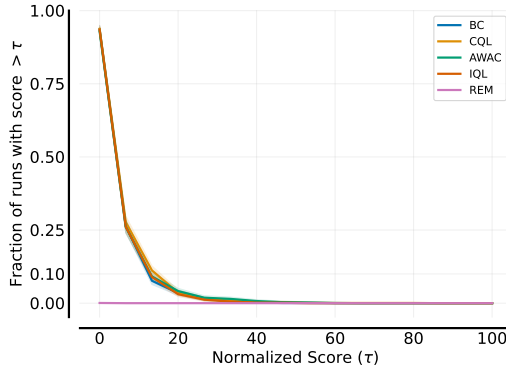

(b) Performance profiles.

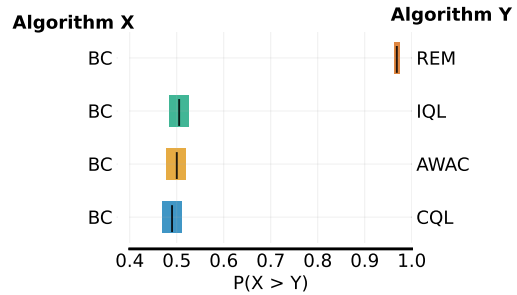

(c) Probability of improvement of BC to other algorithms.

Figure 5: Normalized performance under the Katakomba benchmark for Complete datasets. Each algorithm was run for three seeds and evaluated over 50 episodes resulting in 1500 points for constructing these graphs.

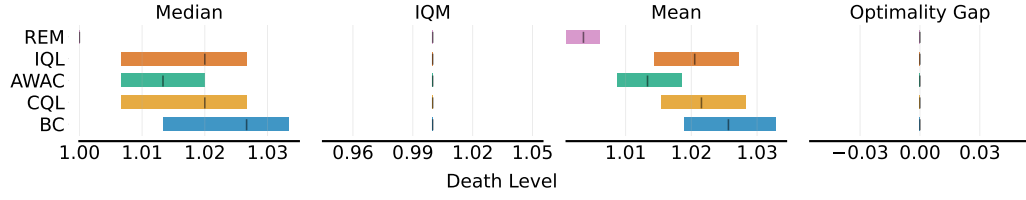

(a) Bootstrapped point estimates.

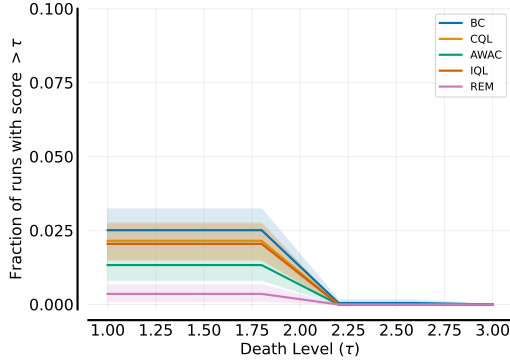

(b) Performance profiles.

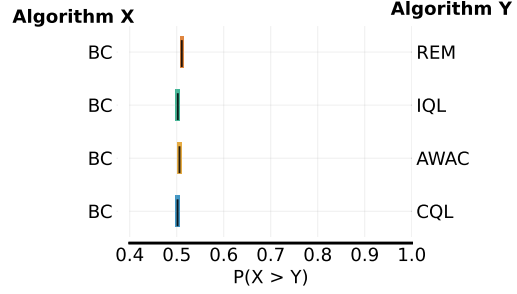

(c) Probability of improvement of BC to other algorithms.

Figure 6: Death levels under the Katakomba benchmark for Base datasets. Each algorithm was run for three seeds and evaluated over 50 episodes resulting in 1950 points for constructing these graphs.

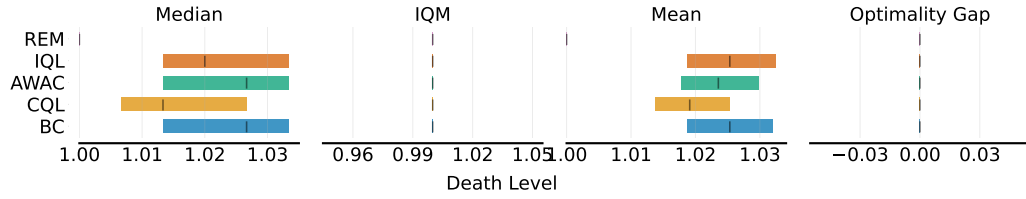

(a) Bootstrapped point estimates.

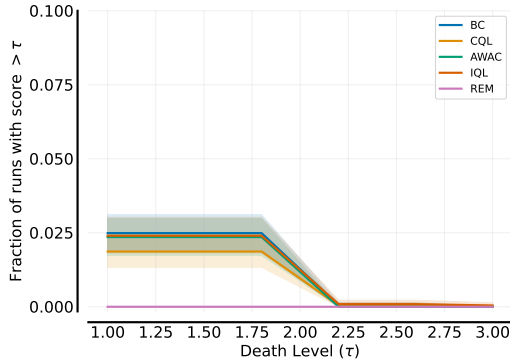

(b) Performance profiles.

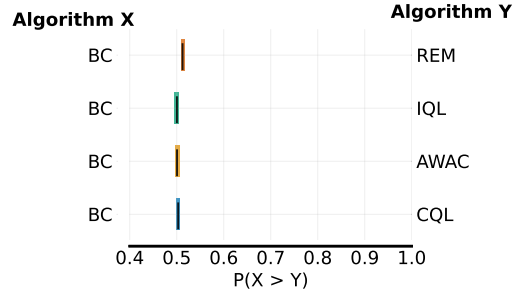

(c) Probability of improvement of BC to other algorithms.

Figure 7: Death level under the Katakomba benchmark for Extended datasets. Each algorithm was run for three seeds and evaluated over 50 episodes resulting in 2250 points for constructing these graphs.

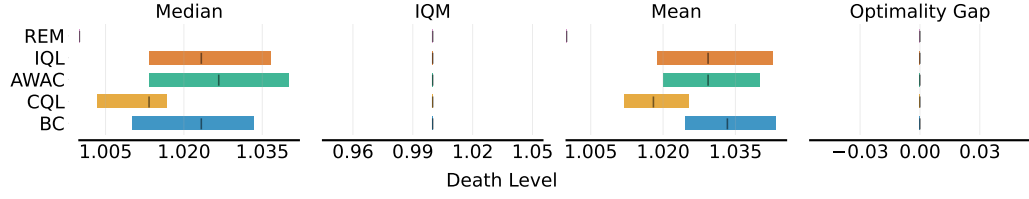

(a) Bootstrapped point estimates.

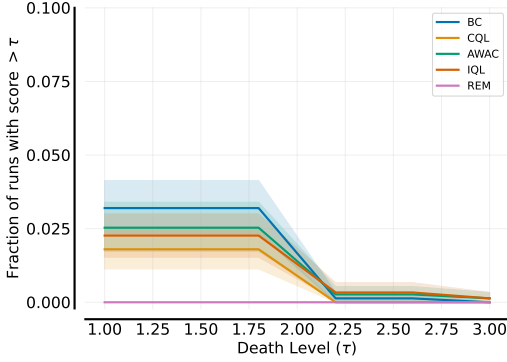

(b) Performance profiles.

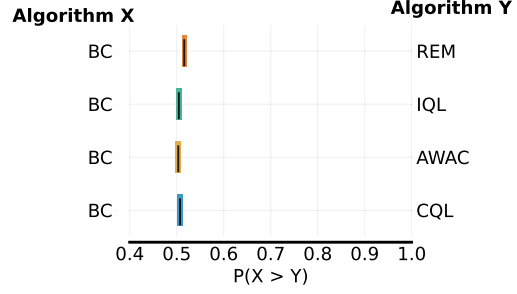

(c) Probability of improvement of BC to other algorithms.

Figure 8: Death levels under the Katakomba benchmark for Complete datasets. Each algorithm was run for three seeds and evaluated over 50 episodes resulting in 1500 points for constructing these graphs.

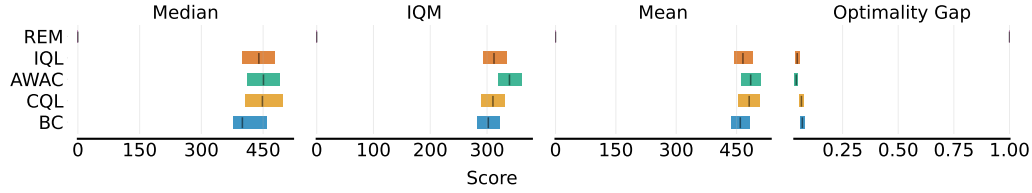

(a) Bootstrapped point estimates.

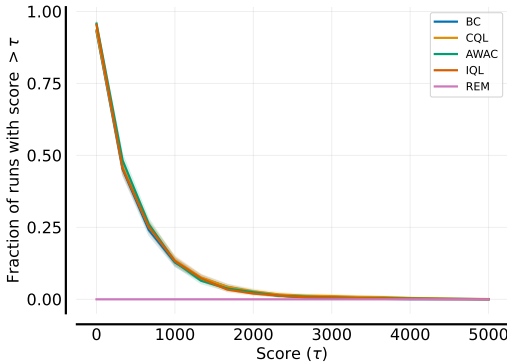

(b) Performance profiles.

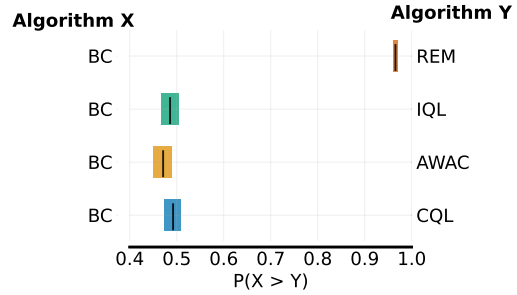

(c) Probability of improvement of BC to other algorithms.

Figure 9: Unnormalized in-game score under the Katakomba benchmark for Base datasets. Each algorithm was run for three seeds and evaluated over 50 episodes resulting in 1950 points for constructing these graphs.

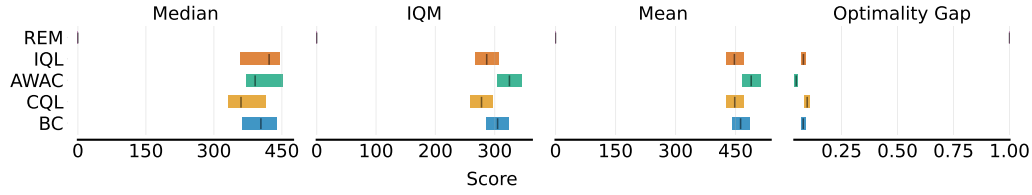

(a) Bootstrapped point estimates.

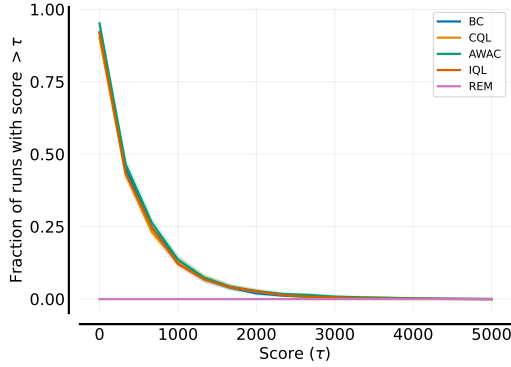

(b) Performance profiles.

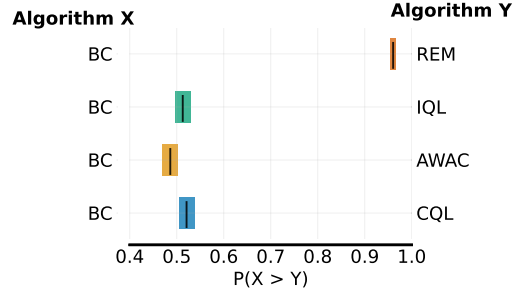

(c) Probability of improvement of BC to other algorithms.

Figure 10: Unnormalized in-game score under the Katakomba benchmark for Extended datasets. Each algorithm was run for three seeds and evaluated over 50 episodes resulting in 2250 points for constructing these graphs.

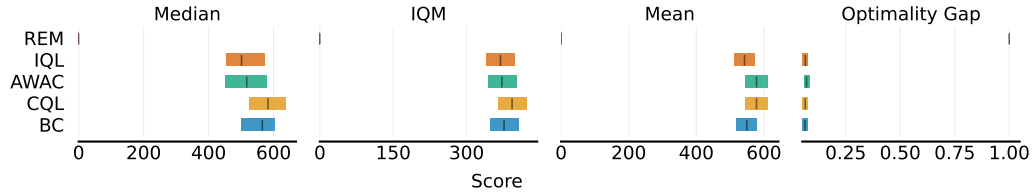

(a) Bootstrapped point estimates.

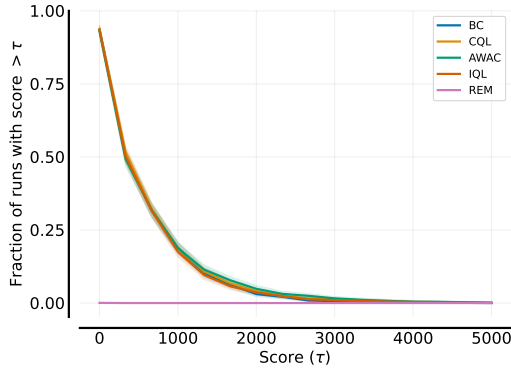

(b) Performance profiles.

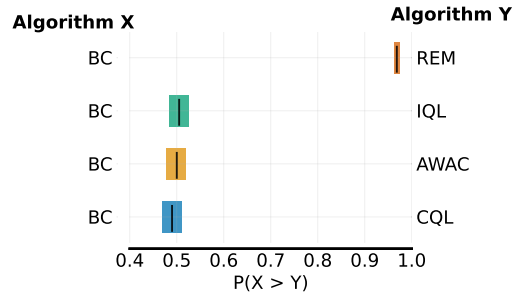

(c) Probability of improvement of BC to other algorithms.

Figure 11: Unnormalized in-game score under the Katakomba benchmark for Complete datasets. Each algorithm was run for three seeds and evaluated over 50 episodes resulting in 1500 points for constructing these graphs.
